# Supplementary material for: A trimanganese cluster-based 2D layer framework with facile single-crystal-to-single-crystal transformation to afford a 1D chain structure
Source: Royal Society of Chemistry journal article supplement (doi:10.1039/b921483f), 2010-01-01
Supplement: b921483f.pdf [file b921483f.pdf]

## Supplementary materials

### A trimanganese cluster-based 2D layer framework with facile single-crystal-to-single-crystal transformation to afford a 1D chain structure

Cheng-Bing Ma,\* Ming-Qiang Hu, Hui Chen, Mei Wang, Chun-Xia Zhang,  
Chang-Neng Chen\* and Qiu-Tian Liu

*State Key Laboratory of Structural Chemistry, Fujian Institute of Research on the Structure of Matter, Chinese Academy of Sciences, Fuzhou, Fujian 350002, China*

*E-mail: [mcb@fjirsm.ac.cn](mailto:mcb@fjirsm.ac.cn) and [ccn@fjirsm.ac.cn](mailto:ccn@fjirsm.ac.cn)*

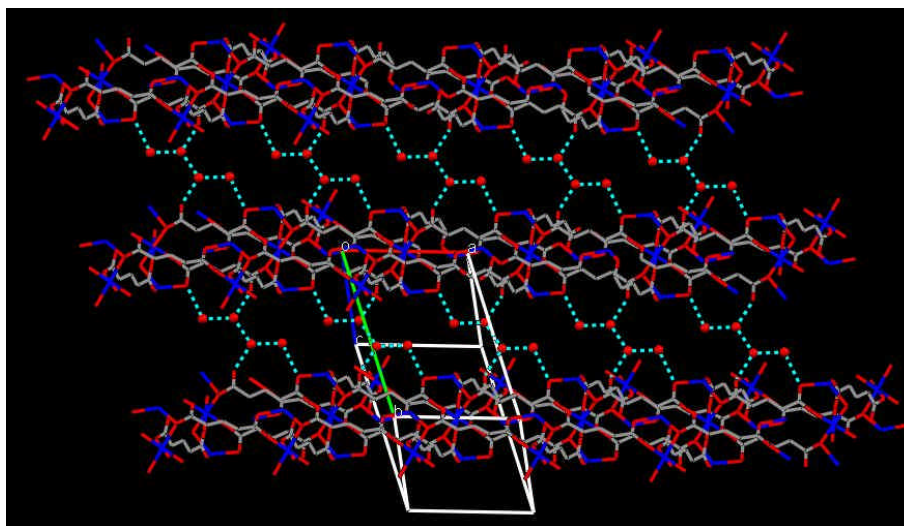

**Fig. S1** A view of 3D layer-stacked supramolecular framework for **1**, showing the zigzag-shaped water tetramers contacted to the Mn-ip host layers via hydrogen-bonds, and sandwiched between the ribbon-shaped inter-layer regions; all hydrogen atoms, bipy ligands and C4-C6/C12-C14/C20-C22 atoms of ip ligands are omitted for clarity.

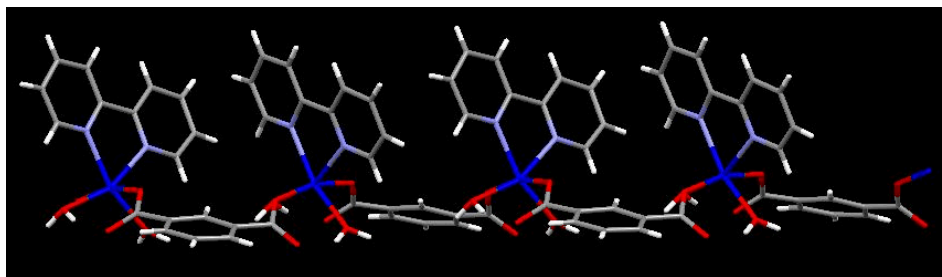

**Fig. S2** The view of 1D chain structure in **2** with the metal ions uniformly separated by 7.635(2) Å, showing all bipy ligands, with a dihedral angle of 90.8(1)° for the adjacent couple, located on the same side of the chain.

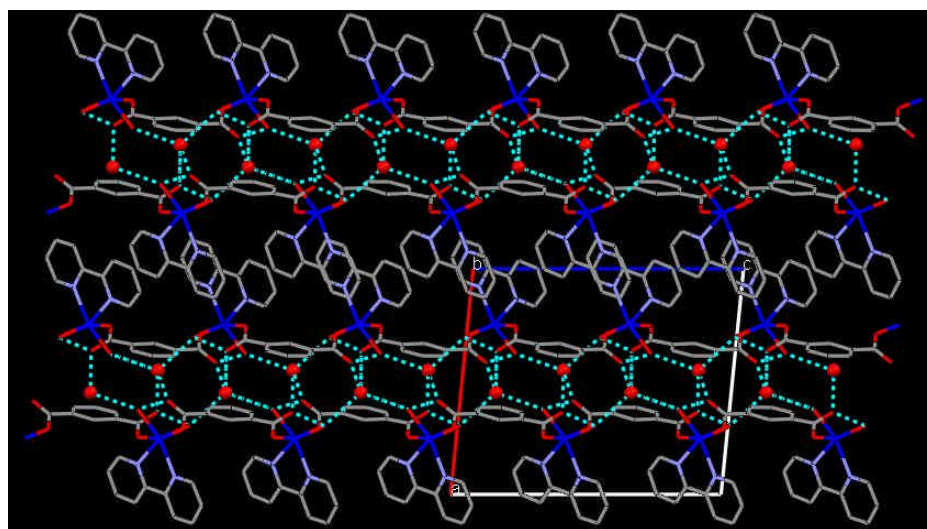

**Fig. S3** A partial packing diagram of **2**, showing the formation of the 3D supramolecular framework derived from the parallel stacking of the H-bonded double-layers. The interlayer bipy ligands display partial  $\pi$ - $\pi$  stacking interactions with a perpendicular ring distance of 3.473(5) Å

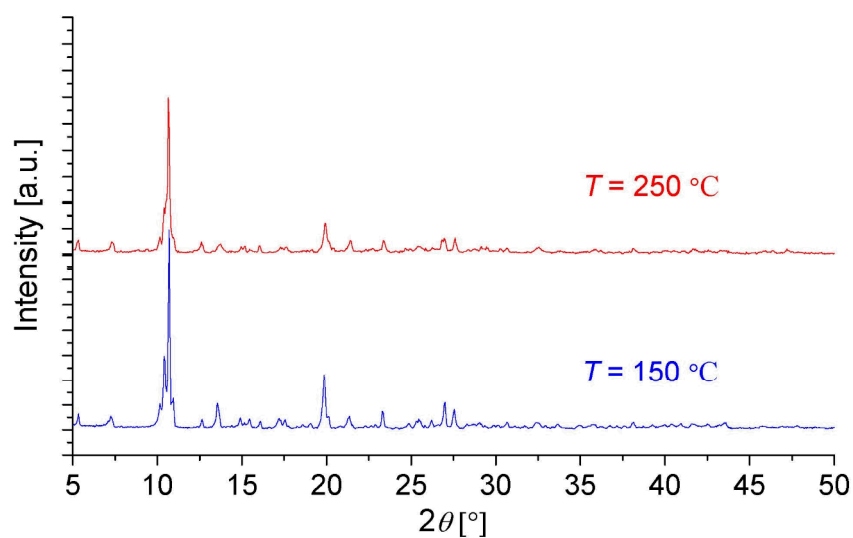

**Fig. S4** A comparison of powder X-ray diffraction patterns for **1** recorded at 250 °C and 150 °C, respectively, showing the stability of polymeric framework at higher temperature.

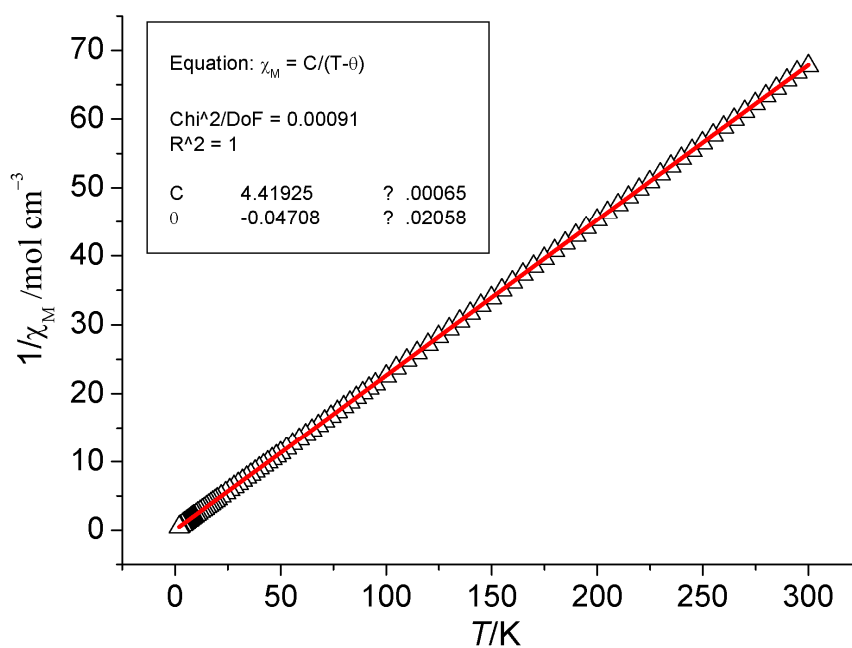

**Fig. S5** The inverse molar magnetic susceptibility ( $1/\chi_M$ ) vs.  $T$  for complex **2** (the red solid line represents the calculated values; the fitting results are listed in the inset).

**Eq. S1** The fit equation for S = 5/2 trimer (the interaction between both ends is neglected)

$$\chi_M = \frac{Ng^2\beta^2}{3kT} \left[ \frac{A}{B} \right]$$

$$A = 2040e^{-32x} + 1860e^{-17x} + 858e^{-4x} + 495e^{7x} + 252e^{16x} + 105e^{23x} + 1365e^{-27x} + 858e^{-14x} \\ + 495e^{-3x} + 252e^{6x} + 105e^{13x} + 30e^{18x} + 858e^{-22x} + 492e^{-11x} + 252e^{-2x} + 105e^{5x} + 30e^{10x} \\ + 3e^{13x} + 252e^{-8x} + 105e^{-x} + 30e^{4x} + 252e^{-12x} + 105e^{-5x} + 30 + 105e^{-7x}$$

$$B = 32e^{-32x} + 48e^{-17x} + 24e^{-4x} + 24e^{7x} + 16e^{16x} + 12e^{23x} + 28e^{-27x} + 24e^{-14x} \\ + 20e^{-3x} + 16e^{6x} + 12e^{13x} + 8e^{18x} + 24e^{-22x} + 20e^{-11x} + 16e^{-2x} + 12e^{5x} + 8e^{10x} \\ + 4e^{13x} + 16e^{-8x} + 12e^{-x} + 8e^{4x} + 16e^{-12x} + 12e^{-5x} + 8 + 12e^{-7x}$$

$$x = \frac{-J}{kT}$$
